## **Attentional fluctuations induce shared variability in macaque primary visual cortex**

George H. Denfield,<sup>1,\*</sup> Alexander S. Ecker,<sup>1,2,3,4,\*</sup>† Tori J. Shinn,<sup>1</sup> Matthias Bethge,<sup>2,3,4</sup> and Andreas S. Tolias<sup>1,3,5</sup>

<sup>1</sup>Department of Neuroscience, Baylor College of Medicine, Houston, TX, USA

<sup>2</sup>Werner Reichardt Centre for Integrative Neuroscience and Institute of Theoretical Physics, University of Tübingen, Germany

<sup>3</sup>Bernstein Centre for Computational Neuroscience, Tübingen, Germany

<sup>4</sup>Max Planck Institute for Biological Cybernetics, Tübingen, Germany.

<sup>5</sup>Department of Electrical and Computer Engineering, Rice University, Houston, TX, USA

† Lead Contact

\* These authors have contributed equally

Corresponding author:

Alexander S. Ecker

Centre for Integrative Neuroscience

Otfried-Müller-Str. 25

72076 Tübingen, Germany

Email: [alexander.ecker@uni-tuebingen.de](mailto:alexander.ecker@uni-tuebingen.de)

Phone: +49-7071-29889

## 1 **Summary**

2 Shared variability is common in neuronal populations, but its origin is unknown. Attention has  
3 been shown to reduce this variability, leading to the hypothesis that attention improves  
4 behavioral performance by suppressing common noise sources. However, even with precise  
5 control of the visual stimulus, the subject's attentional state varies across trials. While these state  
6 fluctuations are bound to induce some degree of correlated variability, it is currently unknown  
7 how strong their effect is, as previous studies have not manipulated the degree of attentional  
8 variability. Therefore, we designed a novel paradigm to dissociate changes in attentional strength  
9 from changes in attentional state variability and found a pronounced effect of attentional state  
10 fluctuations on correlated variability. This effect predominated in layers 2/3, as expected from a  
11 feedback signal such as attention. Thus, significant portions of shared neuronal variability may  
12 be attributable to fluctuations in internally generated signals, such as attention, rather than noise.

13  
14 **Keywords:** spike count correlations, noise correlations, attention, primary visual cortex, V1,  
15 macaque, laminar probes

## Introduction

Neuronal responses to repeated presentations of identical stimuli are highly variable (Softky and Koch, 1993). This variability can be correlated across populations of neurons (Bach and Krüger, 1986; Bair et al., 2001; Zohary et al., 1994), but its origin and significance is unclear.

One factor modulating correlations is attention. Studies of population activity in V4 found that attending to a stimulus inside the receptive fields of the recorded neurons reduced correlations in the trial-to-trial variability of the responses of those neurons to identical stimuli, compared to conditions in which attention was directed away from the receptive field (Cohen and Maunsell, 2009; Mitchell et al., 2009). These studies concluded that increasing the strength of attention reduces correlated variability by suppressing sources of shared noise (Fig. 1A).

However, because the subject's state of attention can be controlled on average but not precisely across trials, the strength of attentional modulation may vary from trial to trial even within a given attention condition (Cohen and Maunsell, 2010, 2011). Therefore, shared variability could also be driven by fluctuations in the state of attention (Fig. 1B). Indeed, the patterns of shared variability induced by fluctuations in the strength and spatial focus of gain-modulating signals such as attention are consistent with experimental data (Ecker et al., 2016; Rabinowitz et al., 2015).

In other words, correlated variability during attention tasks has been interpreted as evidence for both a suppression of common noise by attention (Cohen and Maunsell, 2009; Herrero et al., 2013; Mitchell et al., 2009) as well as trial-to-trial fluctuations of attentional state (Cohen and Maunsell, 2010, 2011; Ecker et al., 2016). However, it is unknown to what extent fluctuations in the state of attention indeed contribute to

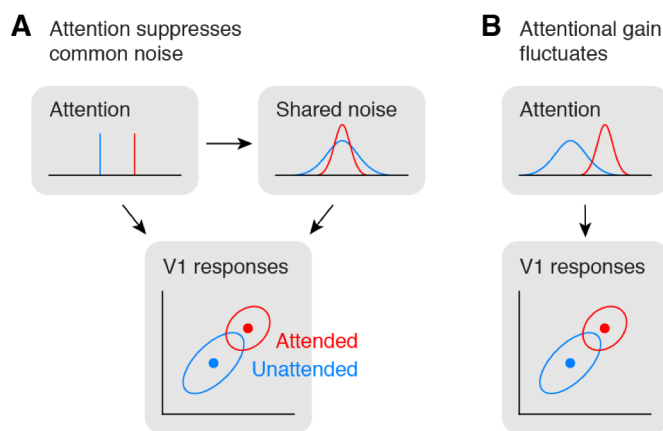

**Figure 1.** Attention and correlated variability. **A)** Hypothesis 1: Attentional gain is increased, but relatively stable under both conditions (top left). Correlated variability is driven by a common noise source (top right), which is suppressed by attention (Mitchell et al. 2009, Cohen & Maunsell 2009). **B)** Hypothesis 2: Attentional gain is increased, but fluctuates from trial to trial (Cohen & Maunsell 2010, 2011, Ecker et al. 2016). Correlated variability is driven by fluctuations of attentional state. The reduction in correlations under attention would imply that the attentional gain is less variable when attending.

61 correlated variability in population responses, because the paradigms employed in previous  
62 studies did not manipulate the degree of attentional fluctuations behaviorally.

63 To create such a scenario, we developed a novel, cued change-detection task that can  
64 dissociate changes in the strength of attention from changes in the variability of the attentional  
65 state by manipulating the behavioral relevance of two simultaneously displayed stimuli across  
66 task conditions. If the dominant factor governing levels of correlated variability is attentional  
67 suppression of common noise, we expect correlations to decrease as attentional strength  
68 increases, resulting in intermediate levels of correlations when both stimuli need to be attended  
69 (Fig. 2A). Alternatively, if fluctuations in attention are the dominant factor modulating  
70 correlations, correlations should be highest when both stimuli need to be attended (Fig. 2B), as  
71 this is the condition where attentional fluctuations are most likely to occur. In practice, of course,  
72 both mechanisms may contribute. However, the degree to which attentional fluctuations are  
73 relevant is revealed by considering the difference in correlations between conditions in which  
74 attention is focused on a single stimulus and when attention to both stimuli is required (Fig. 2C).

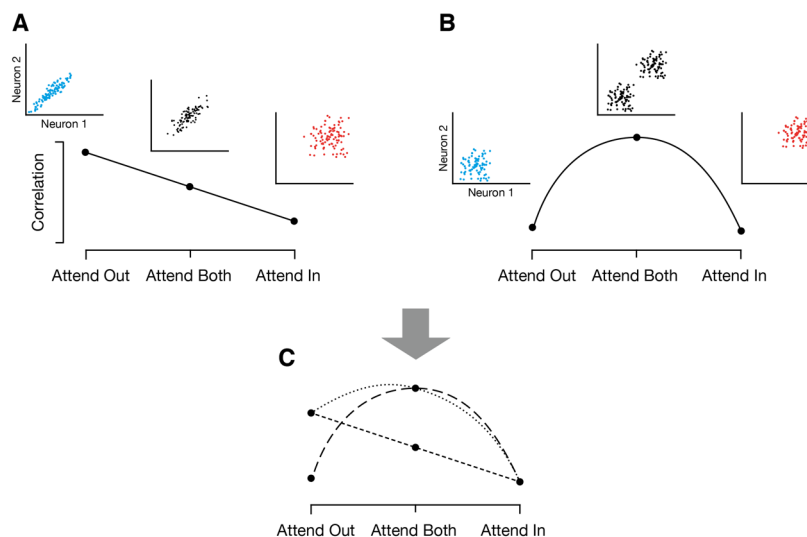

**Figure 2.** Predicted effects of attention on correlations when attending one (“Attend In/Out”) or two stimuli (“Attend Both”). **A)** Scenario in which attentional fluctuations are negligible and attention primarily acts by suppressing common noise sources. In this case, we expect intermediate correlations when attending two stimuli. **B,)** Scenario in which fluctuations in attention induce correlations. In this case, we expect attention to switch randomly between the two targets in the “Attend Both” condition, resulting in the highest correlations in this condition. **C)** Both mechanisms may contribute to different degrees. The relevance of attentional fluctuations is revealed by the relative level of correlation in the “Attend Both” condition.

75 We recorded neuronal responses from primary visual cortex of macaque monkeys while they  
76 performed this task and found that attention modulated firing rates of V1 neurons. We found that  
77 shared variability was highest when both stimuli were behaviorally relevant and lowest in  
78 conditions in which only one stimulus was the focus of attention, arguing that fluctuations in the  
79 state of attention, induced by changes in attentional allocation strategies, are an important factor  
80 governing shared neuronal variability. This modulation predominated in supragranular cortical  
81 layers, as expected if it were due to a feedback signal such as attention (Anderson and Martin,  
82 2009; Maunsell and van Essen, 1983; Rockland and Pandya, 1979; Ungerleider et al., 2008).

83

## 84 **Results**

### 85 **Change detection task and manipulation of attentional allocation strategy**

86 We trained two rhesus macaque monkeys to perform a cued, orientation-change detection task  
87 (Fig. 3A). A trial was initiated when the subject fixated a central fixation spot. Two “noisy” Gabor  
88 patches appeared symmetrically in the lower left and lower right visual field 300ms later. During  
89 the Zero-Coherence Period (ZCP), these patches randomly changed their orientation every frame  
90 (10ms per frame; set of 36 orientations evenly spaced between 0 and 175 degrees). After a random  
91 period of time, drawn from an exponential distribution (minimum of 0.01s, mean of 2.17s, and  
92 maximum of 5s), one of the two stimuli entered the Coherent Period (CP). During the CP one  
93 particular orientation, called the “signal” orientation, was shown with a higher probability than  
94 the other orientations. By varying this probability, we could control the “coherence” of the  
95 stimulus, making the occurrence of the signal orientation more or less obvious over the  
96 background orientation noise, to manipulate the difficulty of a trial. The occurrence of this signal  
97 orientation was the change the monkey had to detect, which he reported by making a saccade to  
98 the changed stimulus within a short reaction time window. On 10% of trials no signal orientation  
99 occurred, and the monkey was rewarded for maintaining fixation throughout the trial.

100 We used a cued block design to manipulate the focus of the subject’s attentional state  
101 (Fig. 3B), where the cue was the color of the fixation spot. Two of these conditions, “attend in”  
102 (AI) and “attend out” (AO), were similar to those in typical spatial attention tasks, where the  
103 stimulus overlapping the neurons’ receptive fields is cued in the AI condition, and the other

104 stimulus is cued in the AO condition. The cues for these conditions (red for AI, blue for AO) were  
 105 100% valid, such that the change occurred only at the cued location. In the condition labeled  
 106 “attend both” (AB), indicated by a black fixation spot, either stimulus had an equal probability  
 107 (50%) of showing the change on a given trial.

108 Our paradigm therefore differs from typical covert attention tasks used to study neuronal  
 109 variability in two respects. First, during the AI and AO conditions in our task, there are no catch  
 110 trials with invalid cues (Cohen and  
 111 Maunsell, 2009) or signals in the  
 112 distractor that need to be ignored  
 113 (Herrero et al., 2013). While catch  
 114 trials are typically used to measure the  
 115 behavioral shift due to attention, they  
 116 are likely to induce attentional  
 117 fluctuations, as they render the cue  
 118 unreliable and encourage some  
 119 degree of attentional focus on the non-  
 120 cued stimulus by rewarding  
 121 successful performance at that  
 122 location. As our goal in the AI and AO  
 123 conditions is to minimize attentional  
 124 fluctuations, we used 100% reliable  
 125 cues. In our third condition (AB),

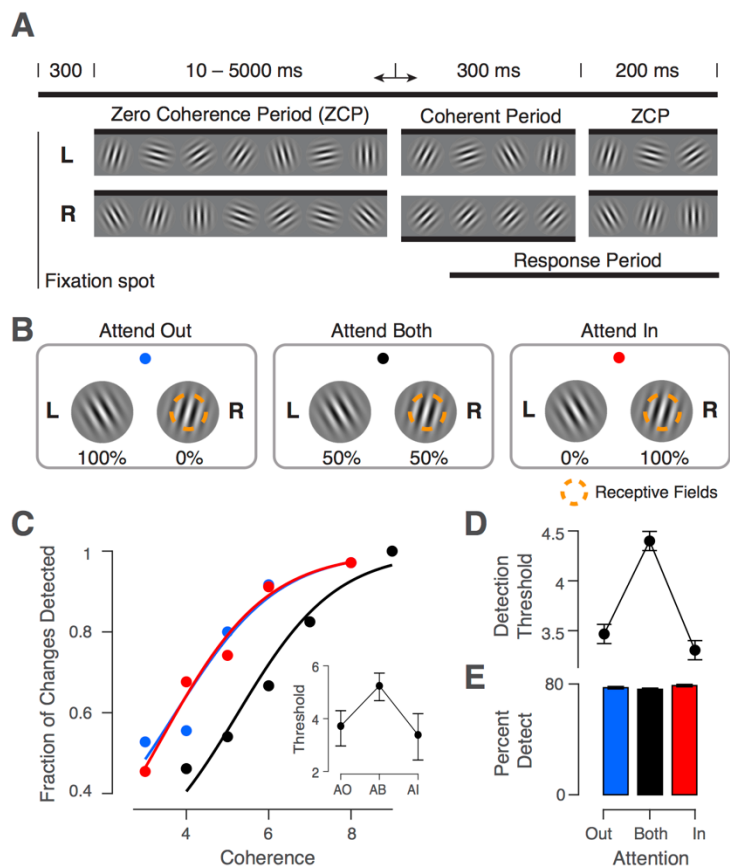

**Figure 3.** Task diagram with behavioral results. **A**) Orientation change-detection task. Two stimuli (L: left, R: right) randomly change their orientation during the ZCP (length 10-5000ms). One stimulus (R in this example) then enters the CP (300ms) when the signal orientation is shown (coherence exaggerated for clarity). This period is followed by another 200ms ZCP to allow time for a behavioral response. **B**) Illustration of attention conditions. Attention is cued according to fixation spot color. This color scheme is used in all figures to represent each condition. Percentages below the stimuli indicate the probability that the change occurs in this stimulus on a given trial. One stimulus overlaps the recorded neurons’ receptive fields. **C**) Example session psychophysical performance. Individual points represent fraction of changes detected at a given coherence. Solid lines indicate fit of logistic function to the data. Inset shows detection threshold with 95% CIs. **D**) Behavioral summary. Same as inset in **c**, but averaged across sessions in our dataset (N=27; mean±SEM). **E**) Percentage of changes detected in each condition averaged across sessions (mean±SEM).

126 indicated by a black fixation spot, either stimulus was equally likely to change. We used this  
127 condition as the baseline to measure the behavioral improvement attributable to attention,  
128 analogous to how other paradigms use catch trials.

129 There were, therefore, three attentional conditions but two attentional strategies that our task  
130 engaged. To maximize reward in the AI and AO conditions, attention should be focused on only  
131 the cued stimulus. With attention deployed consistently across trials with regard to spatial  
132 location, attentional state fluctuations should be minimized. In the AB condition, attention should  
133 fluctuate more strongly between the two spatial locations across trials, as ignoring one of the  
134 stimuli is no longer a viable strategy for maximizing reward. One way to conceive of this  
135 allocation strategy is that the AB condition is comprised of a mixture of the attentional states  
136 deployed in the AI and AO conditions. Note, attentional state fluctuations need not be non-  
137 existent in the AI and AO conditions but only decreased relative to the AB condition in order to  
138 test our hypothesis.

139 If subjects used the strategies described above, there should be some trials in the AB condition  
140 where the subject attended the unchanged stimulus and required a higher coherence level to  
141 notice a change in the correct stimulus on that trial. Such occurrences would lead to a rightward  
142 shift in the psychometric function and higher detection thresholds in the AB condition. The  
143 example session in Figure 3C exhibits a clear rightward shift in the psychometric curve along  
144 with a significantly elevated coherence threshold in the AB condition. This effect was consistent  
145 across sessions (Fig. 3D,  $p < 10^{-10}$ , two-way ANOVA), being present in 22 out of 27 sessions. To  
146 avoid potential confounds from changes in task difficulty across attention conditions, we  
147 balanced the overall percent correct performance in each condition by raising coherence levels  
148 one step in the AB condition. Overall, subjects identified an average of  $77 \pm 1.2\%$  of changes, and  
149 there was no significant effect of attention condition on performance (Fig. 3E,  $p = 0.10$ , two-way  
150 ANOVA).

151 Our goal was to develop a behavioral paradigm in which attention could fluctuate or shift  
152 between two stimulus locations – the AB condition – and remain focused on one location in the  
153 other conditions. While our behavioral results are consistent with this attentional allocation  
154 strategy, they are also consistent with a strategy in which attention acts as a zoom lens, as



155 suggested in Eriksen and St James (1986), widening its focus to encompass both stimuli  
156 simultaneously. Note, the fact that detection thresholds are elevated in the AB condition suggests  
157 that if attention is allocated to both stimuli simultaneously, the stimuli are not processed to the  
158 same degree as they are in the AI or AO conditions. That is, widening the attentional field entails  
159 a reduction in attentional strength within the field. As we will see, however, these strategies make  
160 different predictions for the patterns of correlated variability we expect to see across our task  
161 conditions.

162

### 163 **Attentional modulation of neuronal firing rates**

164 While subjects performed the task, we recorded spiking responses from neurons in primary  
165 visual cortex using 32-channel silicon probes with a spacing of 60 $\mu$ m between channels  
166 (NeuroNexus V1x32-Edge-10mm-60-177). We recorded 416 single units (15.4 $\pm$ .95 units per  
167 session) across 27 sessions (N=7 from Subject B, N=20 from Subject D) from two male macaque  
168 monkeys. The two Gabor stimuli in our task were placed symmetrically in the lower visual field  
169 with one stimulus covering the receptive fields of the recorded neuronal population. Given the  
170 laminar nature of our recordings, receptive fields overlapped almost completely.

171 Our highly dynamic stimulus drove neurons strongly, with mean firing rates of 23.2 $\pm$ 1.1  
172 spikes/sec across sessions. Consistent with previous studies we found that attention increased  
173 firing rates of V1 neurons (McAdams and Maunsell, 1999; McAdams and Reid, 2005; Motter, 1993;  
174 Roelfsema et al., 1998), with on average ~30% of single units being significantly modulated by  
175 attention in a given session. This modulation was present in both the AI and AB conditions and  
176 appeared strongest early in the ZCP (Fig. 4A).

177 Note, our dataset contains fewer trials of long duration, given the exponential distribution of  
178 ZCP lengths and a slight tendency of subjects to prematurely abort longer trials (only ~40% of  
179 valid trials are longer than 1s, and ~15% are longer than 2s). We thus focused our analyses on the  
180 first second after stimulus onset, in which attentional modulation of firing rates was strongest,  
181 and on correct trials, where we can have the most confidence that the subject's attention was  
182 oriented as desired in our task. Additionally, note that all analyses of firing rates and spike counts  
183 were performed during the ZCP, before any changes in stimulus coherence or behavioral



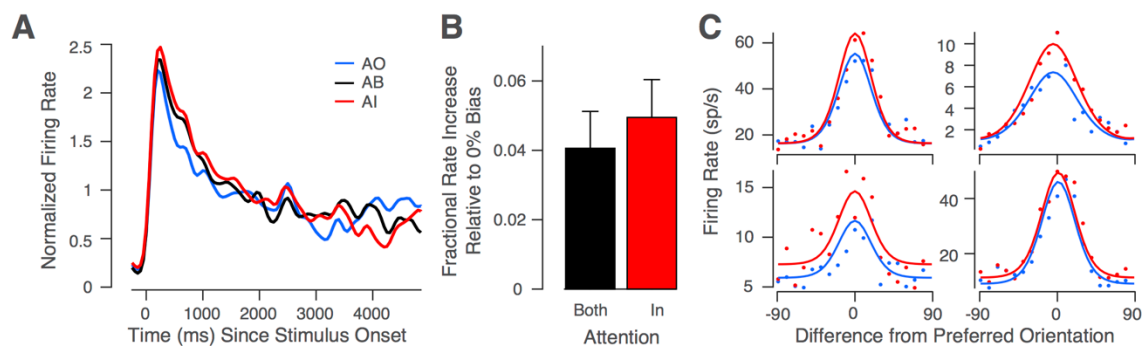

**Figure 4.** Attentional modulation of neuronal responses **A)** Example session spike density function for each condition, normalized to the average response in AI condition (mean across units). **B)** Fractional increase in firing rates in the AB and AI conditions relative to the AO condition averaged across sessions (N=27; mean±SEM). **C)** Example single unit tuning curves in AI (red) and AO (blue) conditions. Dots show responses to specific orientations; solid lines show fitted von Mises functions.

184 responses were made, ensuring that analyses were performed on identical stimuli across  
185 conditions.

186 We first calculated fractional firing rate increases in the AI and AB conditions, relative to the  
187 AO condition (Fig. 4B). During this interval, firing rates in the AI and AB conditions were  
188 significantly elevated relative to the AO condition (AI:  $5.0 \pm 1.1\%$  increase,  $p = 0.0001$ , Bonferroni-  
189 corrected t-test,  $\alpha = 0.0167$ ; AB:  $4.1 \pm 1.1\%$ ,  $p = 0.001$ ) but not different from each other ( $p = 0.35$ ).  
190 Amongst the roughly 30% of units showing significant modulation of firing rates by attention,  
191 around 32% showed pure gain modulation, around 20% showed pure offset modulation, while  
192 the remainder exhibited a mixture of multiplicative and additive modulation. Examples of pure  
193 gain- versus pure offset-modulated cells are shown in Figure 4C.

194

### 195 Differentiating the effects of attention on shared variability

196 Our behavioral and neurophysiological results so far, beyond demonstrating that our task  
197 engages attention, are consistent with two different attentional allocation strategies in the AB  
198 condition, while we conclude that attention is primarily focused on the single, relevant stimulus  
199 in the AI and AO conditions. The first strategy involves widening the focus of attention to  
200 encompass both stimuli. In this case, we would expect attentional fluctuations to be negligible.  
201 This scenario would support the interpretation that attention suppresses a common noise source  
202 (Mitchell et al. 2009, Cohen & Maunsell 2009) and we would expect correlations to be intermediate  
203 in the AB condition (Fig. 2A). The second strategy involves shifting the focus of attention

204 randomly between the two stimuli. In this case, we would expect correlations to be highest in the  
205 AB condition (Fig. 2B). Note that this scenario does not rule out the possibility that attention  
206 suppresses a common noise source, as both mechanisms could be at play (Fig. 2C). However,  
207 given that the same dataset has been interpreted as evidence that attention suppresses noise  
208 (Cohen & Maunsell 2009) and that attention fluctuates (Cohen & Maunsell 2010), it is an  
209 important question to quantify to what degree attentional fluctuations induce trial-to-trial  
210 variability.

211

### 212 **Attentional modulation of shared variability**

213 To measure the degree to which attentional fluctuations induce trial-to-trial variability, we  
214 calculated pairwise spike count correlations over repeated presentations of identical ZCP  
215 sequences in each attention condition. Our results match the predictions in Figure 2B and support  
216 the hypothesis that fluctuations in the state of attention are the dominant factor inducing shared  
217 neuronal response variability in our dataset (Fig. 5A). Spike count correlations were significantly  
218 modulated by attention condition ( $p = 0.00002$ , two-way ANOVA), correlations were highest in  
219 the AB condition ( $p = 0.00001$ , t-test, see methods), and correlations in the AI and AO conditions  
220 were not significantly different from one another ( $p = 0.82$ , post-hoc Tukey's test). This  
221 relationship held individually for both subjects (Fig. 5B "task"; Subject B:  $p = 0.013$ , Subject D:  $p$   
222  $= 0.002$ , two-way ANOVA). Task-evoked correlations were higher overall in Subject D than in  
223 Subject B, though both subjects had more comparable correlation levels during fixation when no  
224 stimulus was present (Fig. 5B "fix"). Despite a clear modulation of shared variability across  
225 attention conditions, Fano factors, a measure of individual neuronal variability, assessed over the  
226 same time interval were not modulated significantly by attention condition ( $p = 0.21$ , two-way  
227 ANOVA). However, this result is likely due to a lack of statistical power, because the estimation  
228 error for Fano factors was larger than the expected effect given the correlation differences.

229 Additionally, fixational eye movements, also called micro-saccades, cannot account for our  
230 results, as there was no difference in the number of such events across attention conditions ( $p =$   
231  $0.25$ , two-way ANOVA). Note also that these results are not trivially explained by changes in  
232 firing rates across conditions, as firing rates in the AI condition were elevated compared to the

233 AO condition (Fig. 4B), but  
234 correlation magnitudes were  
235 not significantly different in  
236 these conditions (Fig. 5A and  
237 B). Nor do changes in  
238 stimulus coherence function  
239 as an explanation for elevated  
240 correlations in the AB  
241 condition, as spike counts  
242 were analyzed during the  
243 ZCP before any changes in the  
244 coherence of the stimulus occurred.

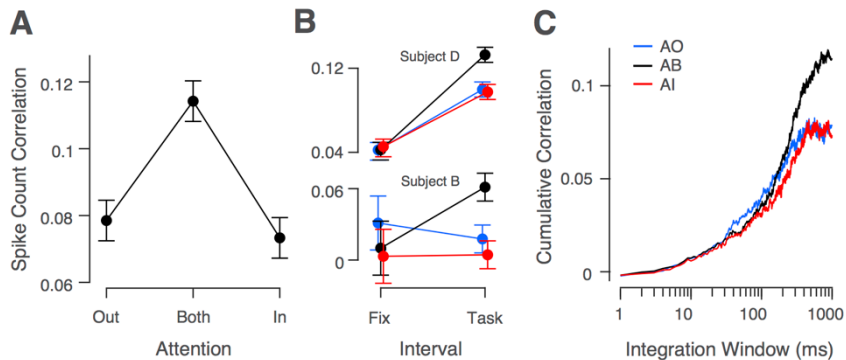

**Figure 5.** Effects of attention on shared variability. **A)** Spike count correlations from 0-1s following stimulus onset, averaged across sessions (N=27). **B)** Spike count correlations shown separately for both subjects during fixation (300ms interval) and during the task (same interval as in A). **C)** Cumulative correlation coefficient, calculated by integrating the cross-correlogram, for each attention condition and averaged across sessions. Data in A-B show mean  $\pm$  SEM, C omits SEM.

245 Next, we wanted to investigate the timescale of the correlation effect we found, to better  
246 understand its origin. Synaptic processes unfold on the millisecond scale whereas cognitive  
247 processes, such as attention, unfold over longer timescales. Behavioral work suggests that  
248 voluntarily shifting attention between different stimuli takes on the order of several hundred  
249 milliseconds (Duncan et al., 1994; Müller et al., 1998). Thus, if attention is indeed shifting between  
250 the two stimulus locations during the AB condition, these psychophysical results provide a lower  
251 bound for the timescale over which we expect to see correlations rise in the AB condition.

252 Using the relationship between spike count correlations and cross-correlograms described in  
253 Bair et al. (2001) and modified in Ecker et al. (2014), we calculated spike train cross-correlograms  
254 for neuronal pairs in each attention condition and integrated them from 1ms to 1000ms, our  
255 maximum counting window. Examining the point at which the resulting correlation levels  
256 saturate provides an estimate of the timescale of correlation. The results in Figure 5C show that  
257 correlations in the AB condition began to diverge from the AI and AO conditions after 200ms,  
258 and correlations in the AI and AO condition saturated to similar levels near 400ms, while AB  
259 correlations continued to rise for several hundred milliseconds more. The time course of these  
260 results fits well with the estimated time course of changes in attentional state (Duncan et al., 1994;  
261 Müller et al., 1998). Interestingly, between 40ms and 400ms, the level of correlations appeared

262 lower in the attended versus unattended conditions (Fig. 5C), consistent with earlier work (Cohen  
263 and Maunsell, 2009; Herrero et al., 2013; Mitchell et al., 2009) and suggesting that attention indeed  
264 suppresses common noise at this faster timescale. However, despite being consistent with  
265 previous results and being observable in both monkeys individually (data not shown), this trend  
266 was not statistically significant in our dataset ( $p = 0.074$  at 100ms, two-way ANOVA without  
267 correction for multiple comparisons).

268

### 269 **Laminar profile of attention effects**

270 To examine the laminar profile of the attentional modulation of firing rates and shared  
271 variability, we calculated the current source density (CSD; Mitzdorf, 1985) across channels for  
272 each session from the task-stimulus evoked local field potentials (Fig. 6A). These profiles were  
273 quite consistent across sessions, with the most prominent stimulus-evoked sink-source  
274 configurations in L5-6 and L1-2/3, largely washing out the earliest sink-source switch typical of  
275 the L4-5 boundary (van Kerkoerle et al. (2017) report a similar effect). We computed CSDs to aid  
276 in the grouping of single units into the supragranular (S), granular (G), or infragranular (I) layers,  
277 but we also took advantage of known electrophysiological characteristics of cells in different  
278 layers (Snodderly and Gur, 1995; see methods). The most reliable such property was the high  
279 spontaneous activity associated with L4C (Snodderly and Gur, 1995), which was readily  
280 discernible from multi-unit activity and was located consistently close to the L4-5 boundary  
281 determined from the CSD. Additional factors included the weaker orientation tuning of the deep  
282 granular layer and smaller receptive fields (Fig. 6A). The first channel below the L4-5 boundary  
283 was our zero-point for relative unit depths. We defined the granular layer as the first 400 $\mu$ m  
284 superficial to the L4-5 boundary, consistent with previous histological (Fitzpatrick et al., 1985;  
285 Lund, 1988) and recent electrophysiological studies (Hansen et al., 2012; Smith et al., 2013). All  
286 units above this 400 $\mu$ m band were labelled supragranular, and all those below it were labelled  
287 infragranular. The G-I (L4-5) boundary could be determined most reliably across sessions, but  
288 the S-G boundary could not always be determined as precisely. We therefore varied the cut-off  
289 boundary between the supragranular and granular groups over a span of nearly 200 $\mu$ m and re-  
290 calculated the results presented in Figure 6. Doing so did not qualitatively affect our results.

291 Attentional modulation  
 292 of V1 neuronal responses is  
 293 thought to be a feedback  
 294 process (Buffalo et al., 2009;  
 295 Buschman and Miller, 2007;  
 296 Gregoriou et al., 2009), and  
 297 anatomical work has shown  
 298 that feedback projections  
 299 from higher order visual  
 300 areas target the supra- and  
 301 infra-granular layers  
 302 (Anderson and Martin, 2009;  
 303 Maunsell and van Essen,  
 304 1983; Rockland and Pandya,  
 305 1979; Ungerleider et al.,  
 306 2008). As a result, we  
 307 expected the strongest  
 308 attentional modulation of  
 309 firing rates to manifest there.  
 310 Indeed, in the supragranular

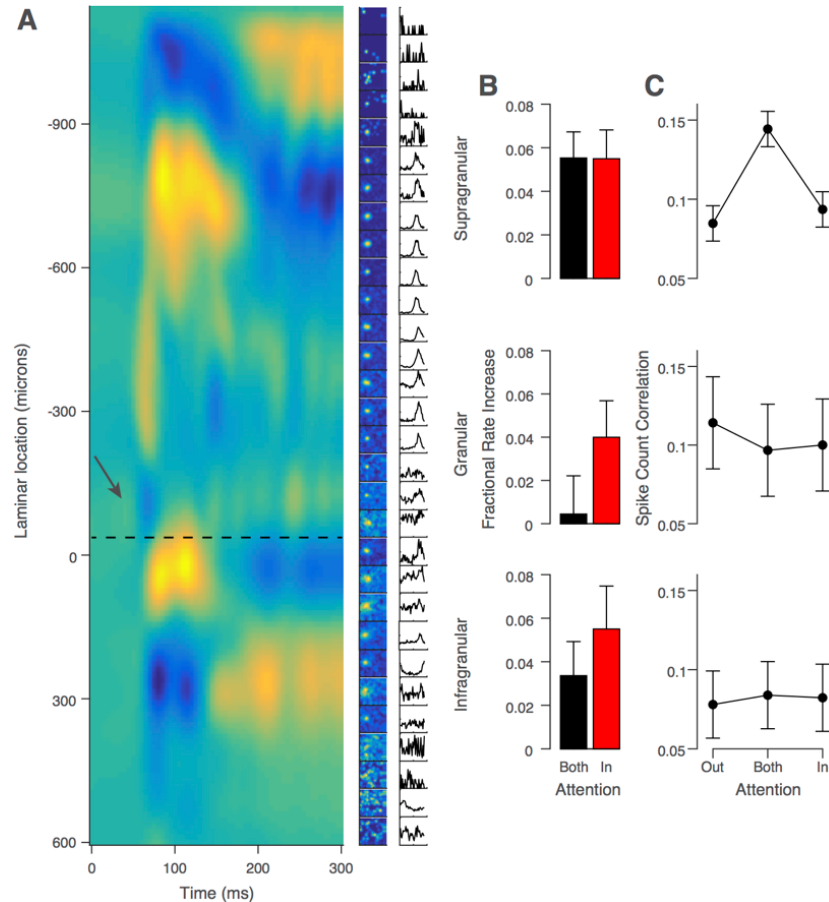

**Figure 6.** Laminar profile of attention effects. **A)** Example session CSD profile evoked by task stimulus (left column) with multi-unit receptive fields (middle) and tuning curves (right). Depths are relative to first L5 channel. Dotted black line shows L4-5 transition. Arrow shows initial current sink-source flip in L4C. **B)** Fractional increase in firing rates in AB and AI, relative to AO, conditions split by laminar group. **C)** Spike count correlation over 0-1s interval split by laminar group. Data in B-C show mean across sessions  $\pm$  SEM (N=27).

311 group, firing rates were modulated most strongly (Fig. 6B), and this modulation was significant  
 312 in both the AB and AI conditions relative to the AO condition (AB:  $5.5 \pm 1.2\%$ ,  $p = 0.0001$ , AI:  
 313  $5.5 \pm 1.3\%$ ,  $p = 0.0004$ , Bonferroni-corrected t-test,  $\alpha=0.025$ ). In the infragranular group, there was  
 314 also significant modulation of firing rates in the AI condition but not the AB condition (AB:  
 315  $3.4 \pm 1.6\%$ ,  $p = 0.045$ , AI:  $5.5 \pm 2.0\%$ ,  $p = 0.011$ ,  $\alpha=0.025$ ). In the granular group, firing rates were not  
 316 significantly elevated in the AB or AI conditions ( $.45 \pm 1.7\%$ ,  $p = 0.814$ , AI:  $4.0 \pm 1.7\%$ ,  $p = 0.035$ ,  
 317  $\alpha=0.025$ ).

318 Next, we examined the laminar profile of attentional effects on spike count correlations  
 319 (Fig. 6C). Correlations were significantly modulated by attention condition in the supragranular

320 group ( $p = 0.0007$ , two-way ANOVA). Post-hoc testing again showed correlations were highest  
321 in the AB condition ( $p = 10^{-6}$ ) and equivalently low in the AI and AO conditions ( $p = 0.84$ ). In the  
322 granular and infragranular groups, correlations were constant across attention conditions.  
323 Although there was a downward trend in overall spike count correlation magnitude from  
324 superficial to deep, there was no significant effect of layer ( $p = 0.62$ , two-way ANOVA; S:  $r_{sc} =$   
325  $0.11 \pm 0.02$ , G:  $r_{sc} = 0.10 \pm 0.03$ , I:  $r_{sc} = 0.08 \pm 0.02$ ).

326

## 327 Discussion

328 We developed a task to dissociate changes in the strength of attentional modulation from changes  
329 in variability in the attentional state by varying the behavioral relevance of two simultaneously  
330 presented stimuli and encouraging the use of different attentional allocation strategies across task  
331 conditions. We found levels of shared variability to be highest in the condition in which both  
332 stimuli were behaviorally relevant, supporting the idea that this condition introduced  
333 competition for attentional resources, which increased attentional state variability. In contrast,  
334 shared variability was lowest in the conditions in which attention could be focused on only one  
335 stimulus. These results support the hypothesis that fluctuations in the state of attention can be a  
336 prominent source of shared neuronal response variability. More specifically, our results for  
337 correlations on timescales on the order of individual trials are most consistent with the scenario  
338 presented in Figure 2B, in line with the predictions of Ecker et al. (2016). More generally, our  
339 results suggest that a significant fraction of shared variability in neuronal populations can be  
340 attributed to fluctuations in behaviorally-relevant, internally generated signals, rather than  
341 shared sensory noise (Ecker and Tolia, 2014; Ecker et al., 2010, 2014, 2016; Goris et al., 2014;  
342 Haefner et al., 2016; Nienborg and Cumming, 2009; Rabinowitz et al., 2015).

343 We focused primarily on the level of correlations in the AB condition, the condition in which  
344 the two possible mechanisms driving correlations made diverging predictions (Fig. 2). Previous  
345 studies have focused on the comparison of AI vs. AO conditions and found a reduction of  
346 correlations when attending (AI condition). At the one-second timescale we analyzed, we did not  
347 observe this reduction, suggesting that the difference between AI and AO conditions observed in  
348 previous studies was not driven by fluctuations in attention. However, at a timescale around



349 100ms, we did find a trend towards lower correlations, consistent with earlier work that  
350 considered faster timescales (Cohen and Maunsell, 2009; Herrero et al., 2013; Mitchell et al., 2009).  
351 Taken together, these results suggest that both mechanisms – suppression of common noise and  
352 attentional fluctuations – are at play, but operate at different timescales. Also consistent with this  
353 picture, Verhoef and Maunsell (2017) recently proposed that the reduction of correlations under  
354 attention is due to a suppression of (variable) normalizing inputs from the unattended surround,  
355 which predicts that this effect should be limited to timescales of synaptic integration (i.e. < 100ms).

356 Because the impact of variability in the attentional state on correlations manifested on a  
357 timescale of individual trials in our task, should we therefore expect that fluctuations in internal  
358 signals, in general, only induce correlations on long timescales? For correlations resulting from  
359 fluctuations in a gain-modulating signal, correlations are roughly proportional to the square of  
360 the number of spikes in the count window (Ecker et al., 2010, 2016; Goris et al., 2014), so it is not  
361 until this window grows sufficiently large that the AB condition effect manifests. Ultimately,  
362 however, this timescale is likely to depend on the mechanism by which such signals impact  
363 neuronal populations. Work on orienting of attention and attentional dwell time suggests that  
364 voluntarily shifting attention between different stimuli takes on the order of several hundred  
365 milliseconds (Duncan et al., 1994; Müller et al., 1998). In our case, this shifting of attention between  
366 stimulus locations is the strategy we were hoping to induce in our paradigm and appears to be  
367 the likeliest explanation for how attention is allocated across trials in our AB condition, given our  
368 behavioral and neurophysiological results. We would, thus, expect that AB correlations should  
369 be elevated on a timescale of at least several hundred milliseconds, which is what we found  
370 (Fig. 5C).

371 Note that this line of reasoning stands regardless of whether the shift in attention that occurs  
372 involves a narrowly-focused attention field encompassing only one stimulus at a time –  
373 resembling the spotlight or narrowly-focused zoom lens models (Eriksen and St James, 1986;  
374 Eriksen and Yeh, 1985) – or whether some degree of attention is allocated to both stimuli  
375 simultaneously, but with one stimulus receiving a greater degree of attention than the other on a  
376 given trial – resembling the Variable Precision model of resource allocation (van den Berg et al.,  
377 2012). In this latter case, the shift of attention corresponds to alternations in which stimulus



378 receives the greater strength of attentional focus on a given trial. The key, however, is that some  
379 change in attentional resources allocated to the receptive field stimulus occurs across trials.  
380 Therefore, our results are not consistent with models of attention that suggest that both stimuli  
381 are processed simultaneously and that a consistent or uniform degree of attentional processing is  
382 distributed across the full field of attention.

383 Recent studies have examined the laminar profile of attentional modulation of firing rates  
384 (van Kerkoerle et al., 2017) or of spike count correlations during passive fixation (Hansen et al.,  
385 2012; Smith et al., 2013). Only one study has examined the laminar relationship between  
386 attentional modulation and shared variability (Nandy et al., 2017), and ours is the first to do so in  
387 V1. Nandy et al. (2017) found significant attentional modulation of firing rates in all layers, with  
388 the strongest effects in the granular layer. In contrast, van Kerkoerle et al. (2017) found the  
389 weakest attentional modulation of firing rates in the granular layer of V1. Our results are in better  
390 agreement with those of van Kerkoerle et al. (2017), as we found the strongest attentional  
391 modulation of firing rates in the supragranular, followed by the infragranular layers, as expected  
392 given the anatomical distribution of feedback cortical connections (Anderson and Martin, 2009;  
393 Maunsell and van Essen, 1983; Rockland and Pandya, 1979; Ungerleider et al., 2008).

394 Regarding correlation magnitude across layers, we observed a different pattern of results  
395 from both Nandy et al. (2017), who found the highest correlations in the granular layer of V4, and  
396 Hansen et al. (2012) and Smith et al. (2013), who found the lowest correlations in the granular  
397 layer in V1. In our study, overall correlation magnitude did not differ significantly by layer. These  
398 differences across studies could be attributable to the variable behavioral demands placed on  
399 each study's subjects, which would be consistent with our overarching hypothesis that  
400 differences in correlation magnitude across studies can be accounted for in large part due to  
401 differences in the nature of the internal signals engaged by different tasks and how they are  
402 deployed to meet the subjects' behavioral needs.

403 Indeed, we created a task in which one condition's behavioral demands were quite different  
404 (AB) from those of the other two conditions (AI, AO), and we found a large difference in  
405 correlations that varied with those demands, which was confined primarily to the supragranular  
406 layers. This modulation of correlations was not present in the infragranular layers, despite

407 attentional modulation of rates in the AI condition. One reason may be a lack of sufficient  
408 statistical power. Most of our isolated single units were from the supragranular layers (just over  
409 eight units per session on average), with about half that number isolated in the infragranular  
410 layers, and fewer still from the granular layer. The difference could also be attributable to the  
411 anatomical and computational characteristics of each layer, which by no means are completely  
412 understood (Callaway, 1998; Douglas and Martin, 2004; Lund, 1988). The infragranular layers  
413 additionally receive feedback from and send projections to subcortical regions (Lund et al., 1975)  
414 and such signals may modulate shared variability differently. Ultimately, the finding that  
415 fluctuations in attention predominantly modulate correlations in the supragranular layers  
416 matches the location where we found the most pronounced attentional modulation of firing rates  
417 and accords well with the known anatomy of corticocortical interactions, particularly for  
418 feedback signals.

419 Finally, there has been an increasing interest in recent years in leveraging population  
420 recording and latent-variable modeling techniques to infer the state of internally-generated,  
421 cognitive signals, such as attention, on more behaviorally-relevant timescales, to better  
422 understand the nature of these signals and their impact on decision-making and behavior (Afshar  
423 et al., 2011; Engel et al., 2016; Latimer et al., 2015; Rabinowitz et al., 2015; Yu et al., 2009). To make  
424 such inferences, these methods make use of the patterns of covariance in population activity and  
425 rely on the assumption that this variability occurs in a low-dimensional space (e.g., the “attention  
426 axis” of Cohen and Maunsell (2010)). A further, but critical, assumption of these techniques is  
427 that much of this shared variability is not noise but is attributable to the action of behaviorally-  
428 relevant, internally generated signals. However, a clearer demonstration that changes in internal  
429 signals indeed contribute significantly to shared neuronal variability was lacking. We presented  
430 a paradigm designed specifically to test for such a contribution, and our results provide support  
431 for this critical assumption. Additionally, our results demonstrate the subtlety of the effects that  
432 internal signals such as attention have on correlated variability, exemplified by the two timescales  
433 over which attention modulated correlations.

## 434 **Author Contributions**

435 Conceptualization, G.H.D, A.S.E and A.S.T; Methodology, G.H.D, T.J.S, A.S.E, A.S.T; Software  
436 and Validation, G.H.D and A.S.E; Formal Analysis, G.H.D; Investigation, G.H.D, T.J.S; Resources,  
437 A.S.E, M.B and A.S.T; Writing – Original Draft, G.H.D; Writing – Review & Editing, G.H.D, A.S.E,  
438 T.J.S, M.B and A.S.T; Visualization, G.H.D; Supervision, A.S.E, M.B and A.S.T; Funding  
439 Acquisition, A.S.E, M.B and A.S.T.

## 440 **Acknowledgments**

441 We thank Amy M. Morgan and Camila Lopez for technical assistance and Dimitri Yatsenko for  
442 discussion and the development of DataJoint. This work was supported by grants NEI R01-  
443 EY018847-05, NEI R01-EY026927-01A1, NEI P30-EY002520-33 and the NIH-Pioneer award DP1-  
444 OD008301 to A.S.T. This work was also supported by the Intelligence Advanced Research  
445 Projects Activity (IARPA) via Department of Interior/Interior Business Center (DoI/IBC)  
446 contract number D16PC00003. The US Government is authorized to reproduce and distribute  
447 reprints for Governmental purposes notwithstanding any copyright annotation thereon. The  
448 views and conclusions contained herein are those of the authors and should not be interpreted  
449 as necessarily representing the official policies or endorsements, either expressed or implied, of  
450 IARPA, DoI/IBC or the US Government; German Research Foundation (DFG) grant EC 479/1-1  
451 to A.S.E; the Bernstein Center for Computational Neuroscience (FKZ 01GQ1002); the German  
452 Excellency Initiative through the Centre for Integrative Neuroscience Tübingen (EXC307);  
453 G.H.D was supported by NEI T32-EY007001-40, Baylor College of Medicine (BCM) and the  
454 BCM Medical Scientist Training Program. The authors have no conflicts of interest to report.

455

456

## References

- 457  
458 Afshar, A., Santhanam, G., Yu, B.M., Ryu, S.I., Sahani, M., and Shenoy, K.V. (2011). Single-trial  
459 neural correlates of arm movement preparation. *Neuron* 71, 555–564.
- 460 Anderson, J.C., and Martin, K.A.C. (2009). The Synaptic Connections between Cortical Areas V1  
461 and V2 in Macaque Monkey. *Journal of Neuroscience* 29, 11283–11293.
- 462 Bach, M., and Krüger, J. (1986). Correlated neuronal variability in monkey visual cortex  
463 revealed by a multi-microelectrode. *Experimental Brain Research* 61, 451–456.
- 464 Bair, W., and O’Keefe, L.P. (1998). The influence of fixational eye movements on the response of  
465 neurons in area MT of the macaque. *Vis. Neurosci.* 15, 779–786.
- 466 Bair, W., Zohary, E., and Newsome, W.T. (2001). Correlated firing in macaque visual area MT:  
467 time scales and relationship to behavior. *The Journal of Neuroscience* 21, 1676–1697.
- 468 van den Berg, R., Shin, H., Chou, W.-C., George, R., and Ma, W.J. (2012). Variability in encoding  
469 precision accounts for visual short-term memory limitations. *Proceedings of the National  
470 Academy of Sciences* 109, 8780–8785.
- 471 Brainard, D.H. (1997). The Psychophysics Toolbox. *Spat Vis* 10, 433–436.
- 472 Buffalo, E.A., Fries, P., Landman, R., Liang, H., and Desimone, R. (2009). A backward  
473 progression of attentional effects in the ventral stream. *Proceedings of the National  
474 Academy of Sciences* 107, 361–365.
- 475 Buschman, T.J., and Miller, E.K. (2007). Top-Down Versus Bottom-Up Control of Attention in  
476 the Prefrontal and Posterior Parietal Cortices. *Science* 315, 1860–1862.
- 477 Callaway, E.M. (1998). Local circuits in primary visual cortex of the macaque monkey. *Annu.  
478 Rev. Neurosci.* 21, 47–74.
- 479 Cohen, M.R., and Maunsell, J.H. (2009). Attention improves performance primarily by reducing  
480 interneuronal correlations. *Nature Neuroscience* 12, 1594–1600.
- 481 Cohen, M.R., and Maunsell, J.H.R. (2010). A Neuronal Population Measure of Attention Predicts  
482 Behavioral Performance on Individual Trials. *Journal of Neuroscience* 30, 15241–15253.
- 483 Cohen, M.R., and Maunsell, J.H.R. (2011). Using Neuronal Populations to Study the  
484 Mechanisms Underlying Spatial and Feature Attention. *Neuron* 70, 1192–1204.
- 485 Douglas, R.J., and Martin, K.A.C. (2004). Neuronal circuits of the neocortex. *Annu. Rev.  
486 Neurosci.* 27, 419–451.

- 487 Duncan, J., Ward, R., and Shapiro, K. (1994). Direct measurement of attentional dwell time in  
488 human vision. *Nature* 369, 313–315.
- 489 Ecker, A.S., and Tolias, A.S. (2014). Is there signal in the noise? *Nature Neuroscience* 17, 750–  
490 751.
- 491 Ecker, A.S., Berens, P., Keliris, G.A., Bethge, M., Logothetis, N.K., and Tolias, A.S. (2010).  
492 Decorrelated neuronal firing in cortical microcircuits. *Science* 327, 584–587.
- 493 Ecker, A.S., Berens, P., Cotton, R.J., Subramaniyan, M., Denfield, G.H., Cadwell, C.R., Smirnakis,  
494 S.M., Bethge, M., and Tolias, A.S. (2014). State Dependence of Noise Correlations in Macaque  
495 Primary Visual Cortex. *Neuron* 82, 235–248.
- 496 Ecker, A.S., Denfield, G.H., Bethge, M., and Tolias, A.S. (2016). On the Structure of Neuronal  
497 Population Activity under Fluctuations in Attentional State. *Journal of Neuroscience* 36,  
498 1775–1789.
- 499 Engel, T.A., Steinmetz, N.A., Gieselmann, M.A., Thiele, A., Moore, T., and Boahen, K. (2016).  
500 Selective modulation of cortical state during spatial attention. *Science* 354, 1140–1144.
- 501 Eriksen, C.W., and St James, J.D. (1986). Visual attention within and around the field of focal  
502 attention: a zoom lens model. *Percept Psychophys* 40, 225–240.
- 503 Eriksen, C.W., and Yeh, Y.Y. (1985). Allocation of attention in the visual field. *J Exp Psychol*  
504 *Hum Percept Perform* 11, 583–597.
- 505 Fitzpatrick, D., Lund, J.S., and Blasdel, G.G. (1985). Intrinsic connections of macaque striate  
506 cortex: afferent and efferent connections of lamina 4C. *J. Neurosci.* 5, 3329–3349.
- 507 Goris, R.L.T., Movshon, J.A., and Simoncelli, E.P. (2014). Partitioning neuronal variability. *Nat.*  
508 *Neurosci.* 17, 858–865.
- 509 Gregoriou, G.G., Gotts, S.J., Zhou, H., and Desimone, R. (2009). High-Frequency, Long-Range  
510 Coupling Between Prefrontal and Visual Cortex During Attention. *Science* 324, 1207–1210.
- 511 Haefner, R.M., Berkes, P., and Fiser, J. (2016). Perceptual Decision-Making as Probabilistic  
512 Inference by Neural Sampling. *Neuron* 90, 649–660.
- 513 Hansen, B.J., Chelaru, M.I., and Dragoi, V. (2012). Correlated variability in laminar cortical  
514 circuits. *Neuron* 76, 590–602.
- 515 Herrero, J.L., Gieselmann, M.A., Sanayei, M., and Thiele, A. (2013). Attention-Induced Variance  
516 and Noise Correlation Reduction in Macaque V1 Is Mediated by NMDA Receptors. *Neuron*  
517 78, 729–739.

- 518 Hubel, D.H., and Wiesel, T.N. (1968). Receptive fields and functional architecture of monkey  
519 striate cortex. *J. Physiol. (Lond.)* 195, 215–243.
- 520 van Kerkoerle, T., Self, M.W., and Roelfsema, P.R. (2017). Layer-specificity in the effects of  
521 attention and working memory on activity in primary visual cortex. *Nature*  
522 *Communications* 8, 13804.
- 523 Latimer, K.W., Yates, J.L., Meister, M.L.R., Huk, A.C., and Pillow, J.W. (2015). NEURONAL  
524 MODELING. Single-trial spike trains in parietal cortex reveal discrete steps during decision-  
525 making. *Science* 349, 184–187.
- 526 Livingstone, M.S., and Hubel, D.H. (1984). Anatomy and physiology of a color system in the  
527 primate visual cortex. *J. Neurosci.* 4, 309–356.
- 528 Lund, J.S. (1988). Anatomical organization of macaque monkey striate visual cortex. *Annu. Rev.*  
529 *Neurosci.* 11, 253–288.
- 530 Lund, J.S., Lund, R.D., Hendrickson, A.E., Bunt, A.H., and Fuchs, A.F. (1975). The origin of  
531 efferent pathways from the primary visual cortex, area 17, of the macaque monkey as shown  
532 by retrograde transport of horseradish peroxidase. *The Journal of Comparative Neurology*  
533 164, 287–303.
- 534 Maunsell, J.H., and van Essen, D.C. (1983). The connections of the middle temporal visual area  
535 (MT) and their relationship to a cortical hierarchy in the macaque monkey. *J. Neurosci.* 3,  
536 2563–2586.
- 537 McAdams, C.J., and Maunsell, J.H. (1999). Effects of attention on orientation-tuning functions of  
538 single neurons in macaque cortical area V4. *The Journal of Neuroscience* 19, 431–441.
- 539 McAdams, C.J., and Reid, R.C. (2005). Attention modulates the responses of simple cells in  
540 monkey primary visual cortex. *J. Neurosci.* 25, 11023–11033.
- 541 Mitchell, J.F., Sundberg, K.A., and Reynolds, J.H. (2009). Spatial Attention Decorrelates Intrinsic  
542 Activity Fluctuations in Macaque Area V4. *Neuron* 63, 879–888.
- 543 Mitzdorf, U. (1985). Current source-density method and application in cat cerebral cortex:  
544 investigation of evoked potentials and EEG phenomena. *Physiol. Rev.* 65, 37–100.
- 545 Motter, B.C. (1993). Focal attention produces spatially selective processing in visual cortical  
546 areas V1, V2, and V4 in the presence of competing stimuli. *Journal of Neurophysiology* 70,  
547 909–919.
- 548 Müller, M.M., Teder-Sälejärvi, W., and Hillyard, S.A. (1998). The time course of cortical  
549 facilitation during cued shifts of spatial attention. *Nat. Neurosci.* 1, 631–634.



- 550 Nandy, A.S., Nassi, J.J., and Reynolds, J.H. (2017). Laminar Organization of Attentional  
551 Modulation in Macaque Visual Area V4. *Neuron* 93, 235–246.
- 552 Nienborg, H., and Cumming, B.G. (2009). Decision-related activity in sensory neurons reflects  
553 more than a neuron's causal effect. *Nature* 459, 89–92.
- 554 Quiroga, R.Q., Nadasdy, Z., and Ben-Shaul, Y. (2004). Unsupervised spike detection and sorting  
555 with wavelets and superparamagnetic clustering. *Neural Comput* 16, 1661–1687.
- 556 Rabinowitz, N.C., Goris, R.L., Cohen, M., and Simoncelli, E.P. (2015). Attention stabilizes the  
557 shared gain of V4 populations. *eLife* 4.
- 558 Rockland, K.S., and Pandya, D.N. (1979). Laminar origins and terminations of cortical  
559 connections of the occipital lobe in the rhesus monkey. *Brain Res.* 179, 3–20.
- 560 Roelfsema, P.R., Lamme, V.A., and Spekreijse, H. (1998). Object-based attention in the primary  
561 visual cortex of the macaque monkey. *Nature* 395, 376–381.
- 562 Shan, K.Q., Lubenov, E.V., and Siapas, A.G. (2017). Model-based spike sorting with a mixture of  
563 drifting t-distributions.
- 564 Smith, M.A., Jia, X., Zandvakili, A., and Kohn, A. (2013). Laminar dependence of neuronal  
565 correlations in visual cortex. *Journal of Neurophysiology* 109, 940–947.
- 566 Snodderly, D.M., and Gur, M. (1995). Organization of striate cortex of alert, trained monkeys  
567 (*Macaca fascicularis*): ongoing activity, stimulus selectivity, and widths of receptive field  
568 activating regions. *J. Neurophysiol.* 74, 2100–2125.
- 569 Softky, W.R., and Koch, C. (1993). The highly irregular firing of cortical cells is inconsistent with  
570 temporal integration of random EPSPs. *The Journal of Neuroscience* 13, 334–350.
- 571 Tolias, A.S., Ecker, A.S., Siapas, A.G., Hoenselaar, A., Keliris, G.A., and Logothetis, N.K. (2007).  
572 Recording chronically from the same neurons in awake, behaving primates. *J. Neurophysiol.*  
573 98, 3780–3790.
- 574 Ungerleider, L.G., Galkin, T.W., Desimone, R., and Gattass, R. (2008). Cortical Connections of  
575 Area V4 in the Macaque. *Cerebral Cortex* 18, 477–499.
- 576 Verhoef, B.-E., and Maunsell, J.H.R. (2017). Attention-related changes in correlated neuronal  
577 activity arise from normalization mechanisms. *Nature Neuroscience*.
- 578 Wichmann, F.A., and Hill, N.J. (2001a). The psychometric function: I. Fitting, sampling, and  
579 goodness of fit. *Percept Psychophys* 63, 1293–1313.
- 580 Wichmann, F.A., and Hill, N.J. (2001b). The psychometric function: II. Bootstrap-based  
581 confidence intervals and sampling. *Percept Psychophys* 63, 1314–1329.



582 Yu, B.M., Cunningham, J.P., Santhanam, G., Ryu, S.I., Shenoy, K.V., and Sahani, M. (2009).  
583 Gaussian-process factor analysis for low-dimensional single-trial analysis of neural  
584 population activity. *J. Neurophysiol.* *102*, 614–635.

585 Zohary, E., Shadlen, M.N., and Newsome, W.T. (1994). Correlated neuronal discharge rate and  
586 its implications for psychophysical performance. *Nature* *370*, 140–143.

587

588

## 589 **Figure Legends**

### 590 **Figure 1. Attention and correlated variability.**

591 **A)** Hypothesis 1: Attentional gain is increased, but relatively stable under both conditions (top  
592 left). Correlated variability is driven by a common noise source (top right), which is suppressed  
593 by attention (Mitchell et al. 2009, Cohen & Maunsell 2009). **B)** Hypothesis 2: Attentional gain is  
594 increased, but fluctuates from trial to trial (Cohen & Maunsell 2010, 2011, Ecker et al. 2016).  
595 Correlated variability is driven by fluctuations of attentional state. The reduction in correlations  
596 under attention would imply that the attentional gain is less variable when attending.

### 597 **Figure 2. Predicted effects of attention on correlations when attending one (“Attend In/Out”) 598 or two stimuli (“Attend Both”).**

599 **A)** Scenario in which attentional fluctuations are negligible and attention primarily acts by  
600 suppressing common noise sources. In this case, we expect intermediate correlations when  
601 attending two stimuli. **B)** Scenario in which fluctuations in attention induce correlations. In this  
602 case, we expect attention to switch randomly between the two targets in the “Attend Both”  
603 condition, resulting in the highest correlations in this condition. **C)** Both mechanisms may  
604 contribute to different degrees. The relevance of attentional fluctuations is revealed by the  
605 difference between focused attention and split attention conditions.

### 606 **Figure 3. Task diagram with behavioral results.**

607 **A)** Orientation change-detection task. Two stimuli (L: left, R: right) randomly change their  
608 orientation during the ZCP (length 10-5000ms). One stimulus (R in this example) then enters the  
609 CP (300ms) when the signal orientation is shown (coherence exaggerated for clarity). This period  
610 is followed by another 200ms ZCP to allow time for a behavioral response. **B)** Illustration of  
611 attention conditions. Attention is cued according to fixation spot color. This color scheme is used  
612 in all figures to represent each condition. Percentages below the stimuli indicate the probability  
613 that the change occurs in this stimulus on a given trial. One stimulus overlaps the recorded  
614 neurons’ receptive fields. **C)** Example session psychophysical performance. Individual points  
615 represent fraction of changes detected at a given coherence. Solid lines indicate fit of logistic

616 function to the data. Inset shows detection threshold with 95% CIs. **D)** Behavioral summary. Same  
617 as inset in **c**, but averaged across sessions in our dataset (N=27; mean±SEM). **E)** Percentage of  
618 changes detected in each condition averaged across sessions (mean±SEM).

619 **Figure 4. Attentional modulation of neuronal responses.**

620 **A)** Example session spike density function for each condition, normalized to the average response  
621 in AI condition (mean across units). **B)** Fractional increase in firing rates in the AB and AI  
622 conditions relative to the AO condition averaged across sessions (N=27; mean±SEM). **C)** Example  
623 single unit tuning curves in AI (red) and AO (blue) conditions. Dots show responses to specific  
624 orientations, solid lines show fitted von Mises functions.

625 **Figure 5. Effects of attention on shared variability.**

626 **A)** Spike count correlations from 0-1s following stimulus onset, averaged across sessions (N=27).  
627 **B)** Spike count correlations shown separately for both subjects during fixation (300ms interval)  
628 and during the task (same interval as in A). **C)** Cumulative correlation coefficient, calculated by  
629 integrating the cross-correlogram, for each attention condition and averaged across sessions. Data  
630 in A-B show mean ± SEM, C omits SEM.

631 **Figure 6. Laminar profile of attention effects.**

632 **A)** Example session CSD profile evoked by task stimulus (left column) with multi-unit receptive  
633 fields (middle) and tuning curves (right). Depths are relative to first L5 channel. Dotted black line  
634 shows L4-5 transition. Arrow shows initial current sink-source flip in L4C. **B)** Fractional increase  
635 in firing rates in AB and AI, relative to AO, conditions split by laminar group. **C)** Spike count  
636 correlation over 0-1s interval split by laminar group. Data in B-C show mean across sessions ±  
637 SEM (N=27).

638

639

## 640 **Materials and Methods**

### 642 **EXPERIMENTAL MODEL AND SUBJECT DETAILS**

643 All behavioral and electrophysiological data were obtained from two healthy, male rhesus  
644 macaque (*Macaca mulatta*) monkeys (B and D) aged 12 and 13 years and weighing 11 and 10 kg,  
645 respectively, during the time of study. All experimental procedures complied with guidelines of  
646 the NIH and were approved by the Baylor College of Medicine Institutional Animal Care and  
647 Use Committee (permit number: AN-4367). Animals were housed individually in a large room  
648 located adjacent to the training facility, along with around ten other monkeys permitting rich  
649 visual, olfactory and auditory interactions, on a 12h light/dark cycle. Regular veterinary care and  
650 monitoring, balanced nutrition and environmental enrichment were provided by the Center for  
651 Comparative Medicine of Baylor College of Medicine. Surgical procedures on monkeys were  
652 conducted under general anesthesia following standard aseptic techniques. To ameliorate pain  
653 after surgery, analgesics were given for 7 days. Animals were not sacrificed after the experiments.

### 655 **METHOD DETAILS**

#### 656 **Visual stimuli and behavioral paradigm**

657 Visual stimuli were two Gabor patches (size: 2–3° depending on eccentricity; spatial frequency:  
658 3–3.5 cycles per degree; contrast: 100% Michelson) presented on CRT monitors (at a distance of  
659 100 cm; resolution: 1600 × 1200 pixels; refresh rate: 100 Hz) using Psychophysics Toolbox  
660 (Brainard, 1997). The monitors were gamma corrected to have a linear luminance response  
661 profile. Video cameras (DALSA genie HM640; frame rate 200Hz) with custom video eye tracking  
662 software developed in LabView were used to monitor eye movements.

663 Monkeys performed a noisy, orientation–change detection task. Trials were initiated by a  
664 sound and the appearance of a colored fixation target (~0.15°). Monkeys were required to fixate  
665 within a radius of 0.5°–1°, but typically fixated much more accurately, as revealed by offline  
666 analysis. After fixating for 300ms, two Gabor patches were presented symmetrically in the lower  
667 left and right visual fields. During what we labeled the Zero-Coherence Period (ZCP), these  
668 stimuli changed their orientation pseudo-randomly every 10ms (uniform distribution over 36

669 orientations spaced by  $5^\circ$  between  $0$  and  $175^\circ$ ) for a random period of time drawn from an  
670 exponential distribution with a minimum of 10ms, mean of 2170ms, and maximum of 5000ms.

671 After this time one of the two stimuli entered the Coherent Period (CP), where one particular  
672 orientation, called the “signal” orientation, was shown with a higher frequency than the other  
673 orientations. The CP lasted 300ms (30 frames), and from trial to trial the number of frames in the  
674 CP showing the signal orientation was selected from a set of five unique “coherences” chosen for  
675 that session, which allowed us to vary the difficulty of the trials within a session and compute  
676 psychometric functions. After this period, the stimulus returned to the ZCP for a further 200ms  
677 to allow sufficient time for subjects to report whether or not they noticed the presence of the signal  
678 orientation by making a saccade to the stimulus showing the change. Subjects were prevented  
679 from responding within the first 100ms of the CP to minimize guessing. Successful identification  
680 of the signal orientation was rewarded with a small drop of juice. On 10% of trials in each  
681 attention condition no change occurred, and subjects were rewarded for maintaining fixation.  
682 Orthogonal signal orientations were used in the left ( $135^\circ$ ) and right ( $45^\circ$ ) stimuli.

683 Note, occurrences of the signal orientation during the CP were not constrained to occur in  
684 successive frames. Also note that the left and right stimuli displayed different orientation  
685 sequences, so that subjects could not identify a change simply by noticing when the two  
686 orientation sequences diverged. Orientation sequences were described as pseudo-random for the  
687 following reason. For each trial a random number generator seed was chosen from a set of five  
688 such seeds selected for a given recording session. Doing so meant there were five unique stimuli  
689 that could be repeated across attention conditions for the purposes of calculating spike count  
690 correlations and Fano factors over identical stimuli. Sequences were constrained to show each  
691 orientation once before any repetitions were allowed so that the maximum number of signal  
692 orientations that could occur by chance in a period of time equal to the CP (300ms) was two.

693 Attention was cued in blocks of trials by the color of the fixation spot (Fig. 3B). In the Attend  
694 Out (AO) condition, 100% of the changes occurred in the non-receptive field stimulus. In the  
695 Attend In (AI) condition, 100% of changes occurred in the receptive field stimulus. In the Attend  
696 Both (AB) condition, the change was equally likely to occur in either stimulus (50% chance that  
697 the change was in the receptive field stimulus). Block transitions occurred after a total of 60 hit

698 and miss trials was achieved (i.e. false alarms did not count). Blocks were randomized in sets of  
699 three so that each attention condition was seen before one was allowed to repeat. Coherences  
700 were increased by one frame in the AB condition to keep task difficulty approximately constant  
701 across conditions.

702

### 703 **Surgical methods**

704 Our surgical procedures followed a previously established approach (Tolias et al., 2007). A cranial  
705 headpost was first implanted under general anesthesia using aseptic conditions in a dedicated  
706 operating room. After premedication with Dexamethasone (0.25–0.5 mg/kg; 48 h, 24 h and on the  
707 day of the procedure) and atropine (0.05 mg/kg prior to sedation), animals were sedated with a  
708 mixture of ketamine (10 mg/kg) and xylazine (0.5 mg/kg). During the surgery anesthesia was  
709 maintained using isoflurane (0.5–2%).

710 After subjects were trained to perform the above described task, they were implanted with a  
711 form-fitted titanium recording chamber, designed based on pre-operatively obtained anatomical  
712 MRI scans, placed at a location over the operculum in V1 determined by stereotactic coordinates  
713 (Tolias et al., 2007). This surgery was performed under identical conditions as described for  
714 headpost implantation. The chamber was attached to the skull using orthopedic screws only. We  
715 used a small amount of dental cement to seal any openings between the bone and the lower  
716 surface of the recording chamber. A custom-made chamber cap was then placed to seal the  
717 chamber and prevent infection. A minimum of three weeks was provided for the implant to heal.  
718 After healing, small 2–3mm trephinations could be performed, in aseptic conditions under  
719 ketamine (10 mg/kg) sedation with ketoprofen (2mg/kg) for analgesia and meloxicam  
720 (0.2mg/kg for two days), to enable access for subsequent daily electrophysiological recordings.

721

### 722 **Electrophysiology in awake, behaving monkeys**

723 We performed daily electrophysiological recordings beginning 48 hours after a craniotomy was  
724 performed. Custom-designed 32 channel, linear silicon probes (NeuroNexus V1x32-Edge-10mm-  
725 60-177) were mounted in a Narishige microdrive (MO-97) with a nested, stainless steel guide tube  
726 composed of one extra-thin walled 23-gauge piece, spanning most of the length of the probe shaft,

727 and a smaller 27-gauge piece (roughly 6mm long) nested inside such that 4mm of the smaller  
728 tubing protruded beyond the large piece. This design enabled a tight fit around the probe to  
729 support it during dural penetrations. We took care during the insertion procedure to ensure that  
730 the dura was penetrated only by the probe itself, rather than the guide tube, to minimize damage  
731 to the superficial layers of cortex. We alternated lowering the guide tube in steps of 250 $\mu$ m and  
732 extending the probe up to ~500 $\mu$ m beyond the guide tube, retracting and repeating as necessary,  
733 until either characteristic changes in the LFP or multi-unit activity, or both, were observed,  
734 indicating successful penetration of cortex.

735 The probe was then lowered in ~250 $\mu$ m steps at < 10 $\mu$ m per second, pausing for several  
736 minutes after each step, until activity was seen on all channels. As a result of this procedure there  
737 would be variable degrees of tissue compression. Some of this compression was relieved early in  
738 the positioning of the probe by retracting the guide tube by ~500 $\mu$ m after the probe was several  
739 hundred microns inside the cortex. If compression remained after completely lowering the probe,  
740 we could successfully relieve it by slowly retracting the guide tube further. The single most  
741 reliable indicator of the position of our probe in cortex before receptive field mapping was a band  
742 of high spontaneous activity corresponding to layer 4C (Snodderly and Gur, 1995), which could  
743 be clearly seen to span roughly 6–7 channels. In general, we found the basic laminar properties  
744 described by Snodderly and Gur (1995) to be very reliable guidelines. After final positioning of  
745 the probe, we allowed between 30–60min for tissue settling and recording stability to become  
746 established. The entire insertion procedure typically took around 3–4 hours, from penetrating the  
747 dura to the start of recording. Receptive field mapping experiments were performed (see **Data**  
748 **Analysis** below for details) to determine where to place one of the two stimuli such that it covered  
749 the recorded neurons' receptive fields for that session.

750

### 751 **Data acquisition and spike sorting**

752 The methods described below for spike detection and spike sorting were adapted for use with  
753 multi-channel silicon probes from our previous methods used for tetrode recordings (see Ecker  
754 et al., 2014). Neural signals were digitized at 24 bits using analog acquisition cards with 30 dB of  
755 onboard gain (PXI-4498, National Instruments, Austin, TX) and recorded continuously at 32 KHz



756 as broad-band signal (0.5 Hz to 16 kHz). Eye movement traces were sampled at 2kHz.

757 Spikes were detected offline when the signal on a given channel crossed a threshold of five  
758 times the standard deviation of the corresponding channel. To avoid artificial inflation of the  
759 threshold in the presence of a large number of high amplitude spikes, we used a robust estimator  
760 of the standard deviation, given by  $\sigma = \text{median}(|x|)/0.6745$  (Quiroga et al., 2004). Spikes were  
761 aligned to the center of mass of the continuous waveform segment above half the peak amplitude.  
762 Code for spike detection is available online at <https://github.com/atlab/spikedetection>.

763 Virtual electrodes consisting of six channels were constructed in a sliding window (stride 2)  
764 spanning the length of the probe to aid in the spike sorting process by enabling some degree of  
765 triangulation, as with tetrodes. Given a channel spacing of 60 $\mu\text{m}$ , in many cases the waveforms  
766 of a single neuron could be detected by several channels. To extract features for spike sorting, we  
767 performed principal component analysis on the extracted waveform segments (individually for  
768 each channel). This step reduced the data to three dimensions per channel, resulting in an 18-  
769 dimensional feature vector. We fit a mixture of  $t$  distributions with a Kalman filter on the cluster  
770 means to track waveform drift (Shan et al., 2017).

771 The number of clusters was determined based on a penalized average likelihood, where the  
772 penalty term was a constant cost per additional cluster. Code for spike sorting is available online  
773 at <https://github.com/aecker/moksm>. Following this automatic step, results of the model were  
774 examined manually for each virtual electrode and single units were flagged at this time according  
775 to degree of cluster isolation, uniqueness of waveforms and size of refractory period. To avoid  
776 duplicate single units due to overlapping channel groups used for spike sorting, we included  
777 only those single units that had their largest waveform amplitude on one of the two central  
778 channels of the group (this was not an issue for the first and last two channels on the probe).

779

## 780 **Dataset and inclusion criteria**

781 Our dataset included 27 sessions (N=7, Subject B; N=20, Subject D), yielding 416 single units  
782 (N=83, Subject B; N=333, Subject D). We included recording sessions with at least 10 single units  
783 that were visually responsive and significantly orientation tuned in each attention condition. To  
784 ensure reliable estimates of neuronal (co-)variability, sessions were also excluded if there were

785 fewer than three (of five possible) valid seed conditions. A seed condition was considered invalid  
786 if in any of the three attention conditions there were fewer than three correct trials generated  
787 using that seed that had sufficient ZCP length available for spike count analysis. On average for  
788 the 1-second analysis window, included sessions had ~10 correct trials per seed per attention  
789 condition.

790 After having collected a complete dataset of 13 sessions from Subject B and a dataset of 29  
791 sessions from monkey D, we found that sessions with recording locations close to the vertical  
792 meridian did not exhibit our predicted main effect. We reasoned that this lack of effect was likely  
793 because the two stimuli were too close to each other, allowing the monkey to attend to both  
794 simultaneously. To verify that this result was not a false positive due to post-hoc analysis, we  
795 collected an independent 10-session dataset at high eccentricities from Subject D (the termination  
796 condition of 10 sessions was set before starting to collect additional data), which confirmed the  
797 effect at high eccentricity. The results reported in this paper include all sessions with x-axis  
798 receptive field eccentricities of at least 3° in Subject B and 3.2° in Subject D (representing the  
799 median such eccentricities for each subject), including the separate validation dataset from  
800 monkey D.

801

## 802 **Data analysis**

### 803 *Analysis of behavioral results*

804 Trial results were classified as 'hits', 'misses', 'correct rejections' (for successful completion of  
805 trials with no change) and 'false alarms' (for saccades made to a stimulus before any change  
806 occurred). For each session, behavior was analyzed by calculating the fraction of changes detected  
807 (hits / [hits + misses]), both conditioned on and marginalized over coherence in each attention  
808 condition. Psychometric functions were plotted as the fraction of changes detected versus  
809 coherence in each attention condition. Using the psignifit toolbox (Wichmann and Hill, 2001a,  
810 2001b) in MATLAB, logistic functions were fit to the attention condition specific curves using the  
811 method of maximum likelihood, and 50% performance thresholds were extracted.

812

### 813 *Analysis of receptive fields*

814 Prior to starting the main task, we quantitatively mapped receptive fields based on unsorted  
815 multi-unit responses using a white noise random dot stimulus. A single square dot of size 0.29  
816 degrees of visual angle was presented on a uniform gray background, changing location and  
817 color (black or white) randomly every three frames, or 30ms, for 1 second. Receptive field profiles  
818 were obtained by spike-triggered averaging.

819

### 820 *Analysis of orientation tuning*

821 Our task allowed us to compute orientation tuning curves for each neuron. We binned the spike  
822 counts in bins of 10ms and used linear regression based on a one-hot encoding of the 15 stimuli  
823 directly preceding the response (i.e. the stimulus is a 36×15-dimensional vector, because there  
824 were 36 possible stimulus orientations). We defined the optimal latency of each neuron as the  
825 time delay that produced the strongest response modulation across orientations (determined by  
826 taking the variance of the regression weights across orientations). The optimal latency of most  
827 neurons was 50ms. We then re-estimated the regression using only that single time lag to obtain  
828 a tuning curve. Significance of tuning was then tested by projecting the weight vector onto a  
829 complex exponential with one cycle, the norm of which was compared to its null distribution  
830 calculated by randomly shuffling orientation labels. A p-value was obtained by performing 1,000  
831 iterations of the shuffling procedure and using the fraction of runs in which the norm of the  
832 shuffled projection was greater than that observed in the real data. Signal correlations were  
833 computed for pairs of neurons by calculating the correlation coefficient between the two cells'  
834 tuning curves.

835

### 836 *Analysis of gain versus offset modulation*

837 For each unit, a von Mises distribution function, parameterized as

$$838 \quad Y = w_1 + \exp(w_2 + w_3 \cos(x - w_4)),$$

839 was fit to the tuning curve obtained across all trials via the method described above. From this fit,  
840 the shape and preferred orientation parameters,  $w_3$  and  $w_4$ , were obtained. These parameters were  
841 assumed not to change across attention conditions, leaving only the offset,  $w_1$ , and gain,  $\exp(w_2)$ ,

842 terms to vary across conditions. New von Mises functions were then fit for each attention condition  
843 using a linear regression model with a binary indicator variable for attention condition and an  
844 interaction term. To illustrate, we write the response  $y$  to orientation  $i$  as

$$845 \quad y_i = w_1 + \exp(w_2 + w_3 \cos(x_i - w_4)) = b_1 + b_2 \theta_i$$

846 where  $\theta_i = \exp(w_3 \cos(x - w_4))$  and was obtained from the overall tuning curve as described.

847 Our linear regression model comparing fits in the AO and AI condition, for example, then  
848 became:

$$849 \quad y_i = \beta_0 + \beta_1 X_{i1} + \beta_2 X_{i2} + \beta_3 X_{i1} X_{i2}$$

850 where  $X_{i1} = \theta_i$  and  $X_{i2} \in \{0, 1\}$ , with 0 coding the AO condition and 1 coding the AI condition.  
851 In this manner we enabled different gain and offset terms to be fit to different attention conditions.  
852 We then assessed whether significant attentional modulation was present by performing an F-test  
853 comparing the full model above to the reduced model containing only the  $\beta_0$  and  $\beta_1$  terms, and  
854 when significant, we tested whether the offset and gain parameters differed between conditions  
855 with t-tests.

### 856 857 *Analysis of firing rates*

858 Visual responsiveness of neurons was determined by comparing firing rates in the 300ms fixation  
859 interval before stimulus onset to those in the 300ms immediately following stimulus onset. A t-  
860 test was performed to test for a significant change in rate following stimulus onset. Spike density  
861 functions (SDFs) were calculated first for a given neuron, across all hit trials grouped by attention  
862 condition and stimulus seed, by counting spikes in 50ms bins relative to stimulus onset and  
863 averaging across trials. Averages were then taken across seeds and smoothed with a Gaussian  
864 window. To calculate SDFs for a given session, individual neuron SDFs were normalized by the  
865 average response in the AO condition, starting from 100ms after stimulus onset, before averaging  
866 across neurons. Fractional firing rate increases were also calculated first at the individual  
867 neuronal level, by averaging all available bins from the first second following stimulus onset  
868 conditioned on the stimulus seed for each attention condition, and then averaging across seeds.

869 The rates were again normalized by the AO condition rate before averaging across neurons to get  
870 a session-level rate modulation for each attention condition. Finally, responses in the AI and AB  
871 conditions were converted to fractional changes relative to the AO responses.

872

### 873 *Analysis of neuronal (co-)variability*

874 Fano factors and spike count correlations were computed on the first 1000ms of the response.  
875 Fano factors were computed as the variance of the spike count divided by its mean. Spike count  
876 correlations were computed as the covariance of the two neurons' z-scored responses to  
877 identical repetitions of the same stimulus condition (seed). Z-scoring and Fano factor  
878 calculations were performed in a block-wise fashion to control for slow fluctuations in firing  
879 rate across a recording session. For the analysis of correlation timescale we used the relationship  
880 between spike count correlations and cross-correlation functions first described in Bair et al.  
881 (2001) to compute a cumulative correlation coefficient,  $r_{CCG}$ . We compute a spike train cross-  
882 correlation function for a pair of neurons  $j$  and  $k$ , as well as a shift-predictor, which is the cross-  
883 correlation function of the spike density functions of neurons  $j$  and  $k$ . The shift-predictor is  
884 subtracted from the cross-correlation function to control for stimulus-induced correlation. This  
885 shift-corrected cross-correlation is denoted  $C_{jk}(\tau)$ . The cumulative cross-correlation is given by

886

$$887 \quad A_{jk} = \int_{-\tau}^{\tau} C_{jk}(t) dt$$

888

889 Following Ecker et al. (2014), the cumulative correlation coefficient is

890

$$891 \quad r_{CCG}(\tau) = \frac{A_{jk}(\tau)}{\sqrt{A_{jj}(T)A_{kk}(T)}}$$

892

893 where T is the last time point in the counting window, in our case 1000ms.

894

### 895 *Analysis of micro-saccades*

896 We identified micro-saccades our subjects made during the ZCP of our task (when spike counts

897 were analyzed) to determine whether our correlation results could be accounted for by an  
898 increase in micro-saccade frequency in our AB condition, relative to the AI and AO conditions.  
899 We followed the definitions described in Bair and O'Keefe (1998). Periods of stable gaze were  
900 taken to be those intervals during which eye position remained within a 0.1-degree window.  
901 Deviations greater than 0.1 degree in 10ms (10deg/s velocity) were taken to be micro-saccades.  
902 The number of micro-saccades during analysis periods was counted for each attention condition  
903 in each session and a two-factor ANOVA was performed to determine whether micro-saccades  
904 differed across conditions.

905

#### 906 *Analysis of laminar data*

907 The CSD profile at each time point was calculated following Mitzdorf (1985) as the second spatial  
908 derivative of the task-stimulus evoked LFPs across channels, smoothed with a Gaussian kernel  
909 to aid visualization. The granular layer was identified according to several criteria used in  
910 conjunction. The earliest current sink to source transition (identified by an arrow in Fig. 6A) is  
911 one indicator, immediately below which is a complementary source to sink transition in L5. We  
912 used additional criteria, described by Snodderly and Gur (1995), to verify this positioning,  
913 because there was a prominent current sink to source transition in L6 as well. These criteria  
914 included higher spontaneous activity and more poorly defined orientation tuning curves  
915 characteristic of the granular layer (Snodderly and Gur, 1995). Additional reports have described  
916 the granular layer to contain smaller receptive fields (Hubel and Wiesel, 1968; Livingstone and  
917 Hubel, 1984), which we also saw (Fig. 6A). In general across sessions, all of these granular layer  
918 features were quite consistent, allowing for confident determination of the L4-5 boundary. The  
919 first L5 channel was labeled as the zero-point for depth. Negative depths are more superficial to  
920 this point. The granular layer was defined as a roughly 400 $\mu$ m band just superficial to the zero-  
921 point (Fitzpatrick et al., 1985; Hansen et al., 2012; Lund, 1988; Smith et al., 2013). The  
922 supragranular group (L1–3) was defined as everything superficial to the top of the granular layer,  
923 and the infragranular group (L5–6) was defined as everything deeper than and including the  
924 zero-point.

925

## 926 QUANTIFICATION AND STATISTICAL ANALYSIS

927 Although customary in the field, we did not consider units or pairs as independent samples.  
928 Treating units as independent samples ignores the session-to-session variability and leads to  
929 underestimated confidence intervals and, consequently, inflated false positive rates. Instead, we  
930 first averaged our measurements across observations within a session and then performed all  
931 statistical tests across sessions, treating the session averages as independent samples. While this  
932 approach sacrifices some statistical power, it leads to conservative estimates of p values.

933 For statistical analyses involving our attention conditions, two-factor ANOVAs were used,  
934 with session and attention condition as the two factors. The Tukey-Kramer method was used for  
935 post-hoc analyses. The only exception is the test for significantly elevated AB condition  
936 correlations, where we performed a one-tailed t-test on a contrast between the AB condition and  
937 the average of the AO and AI condition results. This choice is justified by our previously  
938 published model (Ecker et al., 2016), which predicts this effect and its direction and was  
939 hypothesized and specified before data collection. For assessments of visual responsiveness and  
940 significant increases in fractional firing rates, two-tailed t-tests were used, which, for rate  
941 increases, were Bonferroni-corrected for multiple comparisons. Orientation tuning significance  
942 was assessed according to the permutation test described above. Statistical comparisons were  
943 considered significant at  $p < 0.05$  ( $p < 0.0167$  for Bonferroni-corrected tests for firing rates in  
944 association with Figure 4B, as there were 3 comparisons;  $p < 0.025$  for those associated with Figure  
945 6B, given two comparisons). All error bars show the standard error of the mean (SEM; either  
946 directly calculated or estimated via two-factor ANOVA), except in the Figure 3C inset, which  
947 shows 95% confidence intervals.

948

### 949 Data availability

950 The datasets generated during and analyzed during the current study, along with the code to  
951 replicate the presented analyses, are available from the corresponding author on reasonable  
952 request.
